# Supplementary material for: Linking Light-Dependent Life History Traits with Population Dynamics for Prochlorococcus and Cyanophage
Source: PubMed Central journal article supplement (PMC7112961; doi:10.1128/msystems.00586-19), 2020-03-31
Supplement: msystems.00586-19-s0001.pdf [file msystems.00586-19-s0001.pdf]

We tested different hypotheses and built candidate models based on the initial model that can explain the lysis slowdown. Here we listed the candidate models that reproduced a lysis slowdown and represent their dynamics in the SI Fig 5.

*Candidate model 1: different eclipse and lysis periods*

We used the initial model (Eq. 5) and subdivided latent period into two periods: the eclipse period  $\lambda_e$  and the lysis period  $\lambda_l$  such that  $\lambda = \lambda_e + \lambda_l$ . The dynamics of the candidate model 1 are represented with cyan solid lines in the SI Fig 5.

*Candidate model 2: lysis decrease with viral concentration*

The candidate model 2 is similar to the initial model (Eq. 5) but the latent period is now a function of the viral concentration as follows:

$$\lambda = \lambda_0 MOI \frac{V}{N}. \quad (1)$$

where  $\lambda_0$  is the basal latent period and  $MOI$  is the MOI rate of the treatment ( $MOI = 0.1$ ). The dynamics of the candidate model 2 are represented with green solid lines in the SI Fig 5.

*Candidate model 3: host cells mutation lead to resistance to infection*

The candidate model 3 is based on the initial model (Eq. 5) but allows the host cell  $S$  to mutate at a rate  $r$  and become resistant to infection. The resistant host cells  $R$  grow at a lower rate than  $S$ , given a presumed fitness cost to resistance:

$$\frac{dR}{dt} = \epsilon\mu R \left(1 - \frac{N}{K}\right) + rS - \omega R, \quad (2)$$

where  $\epsilon$  is the cost of resistance ( $\epsilon = 0.5$ ),  $N$  is the total host population such that  $N = S + E + I + R$  and  $r$  is the mutation rate from the class  $S$  to  $R$ . We used the mutation rate measured by [68] for *Prochlorococcus* strain MED4 and consider that cell divide ones per day ( $r = 6.08 \cdot 10^{-6}$  per division). The dynamics of the candidate model 3 are represented with pink solid lines in the SI Fig 5.

*Candidate model 4: unsuccessful adsorption*

The candidate model 4 is based on the initial model (Eq. 5) but we assume that adsorption does not necessarily lead to infection. Instead, viruses  $V$  can adsorb at a rate  $\phi$  to susceptible cells  $S$  which leads to a new infection in an  $\epsilon$  fraction of cases. The dynamics of candidate model 4 are represented with red solid lines in the SI Fig 5.
