# Supplementary material for: Linking Light-Dependent Life History Traits with Population Dynamics for Prochlorococcus and Cyanophage
Source: PubMed Central journal article supplement (PMC7112961; doi:10.1128/msystems.00586-19), 2020-03-31

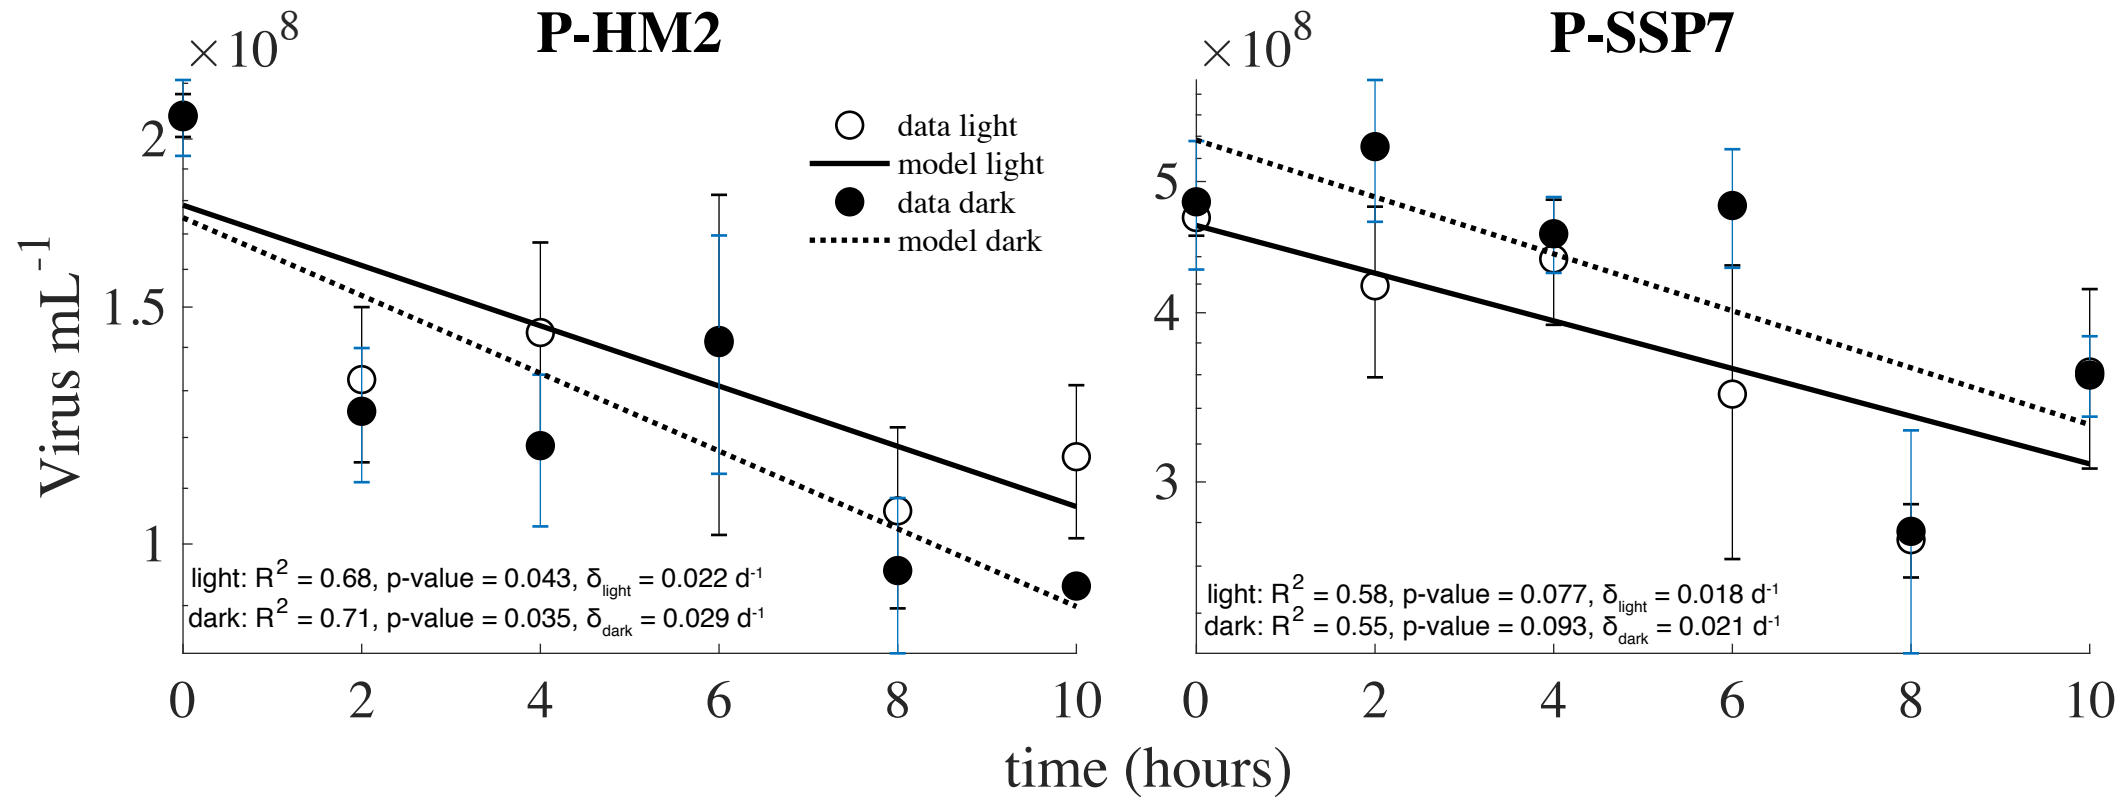

Supplement: msystems.00586-19-sf002.pdf [file msystems.00586-19-sf002.pdf]
