# Supplementary material for: Linking Light-Dependent Life History Traits with Population Dynamics for Prochlorococcus and Cyanophage
Source: PubMed Central journal article supplement (PMC7112961; doi:10.1128/msystems.00586-19), 2020-03-31
Supplement: msystems.00586-19-sf003.pdf [file msystems.00586-19-sf003.pdf]

Akaike Information Criteria

MED4/P-HM2

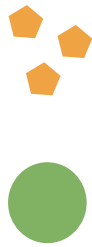

AIC

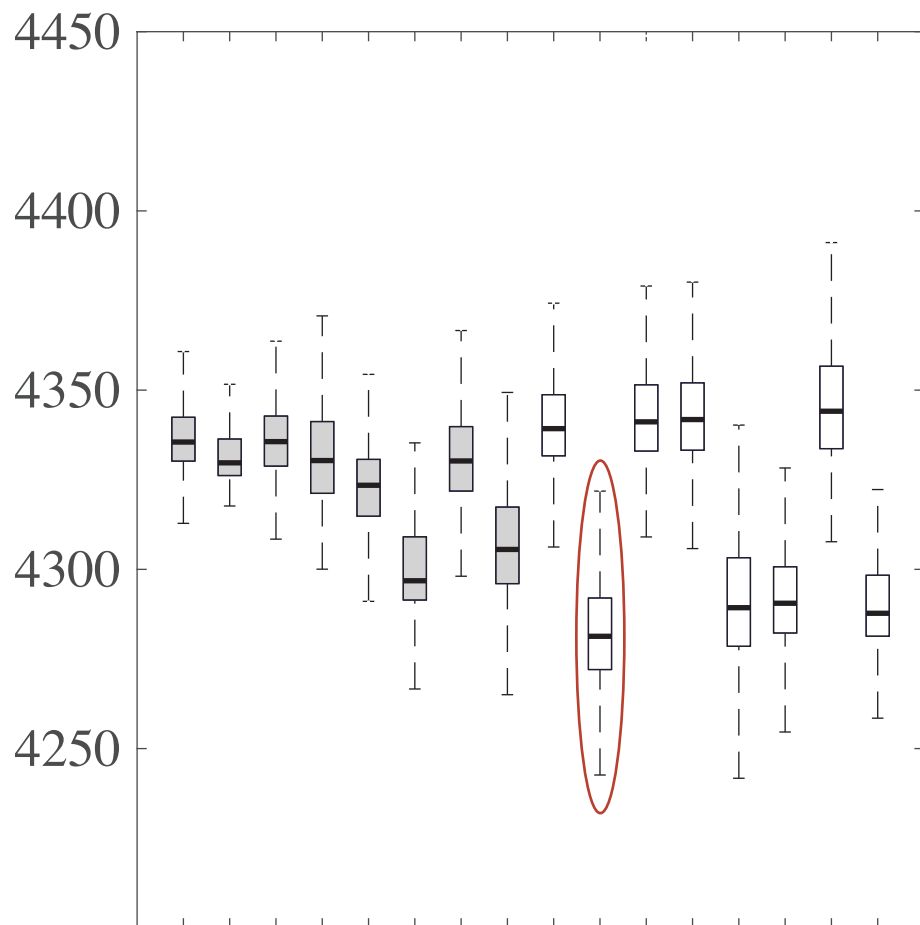

Bayesian Information Criteria

BIC

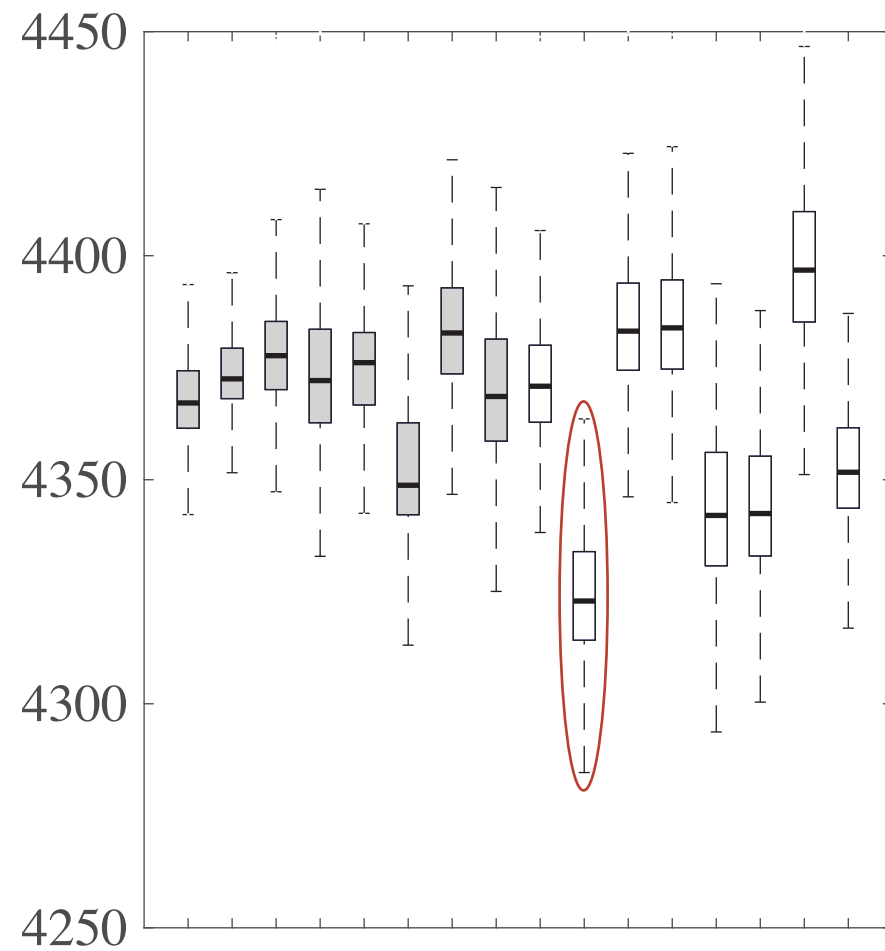

Initial model    Lysis inhibition model

MED4/P-SSP7

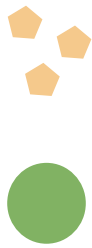

AIC

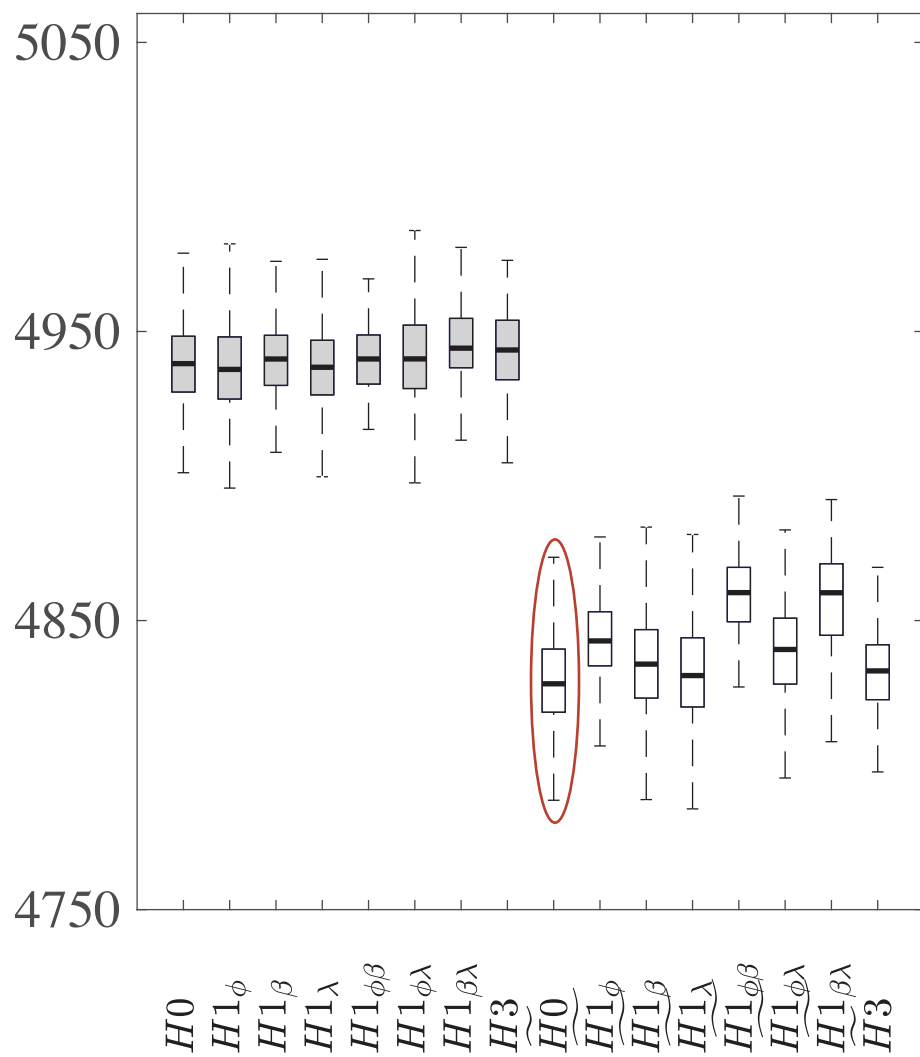

BIC

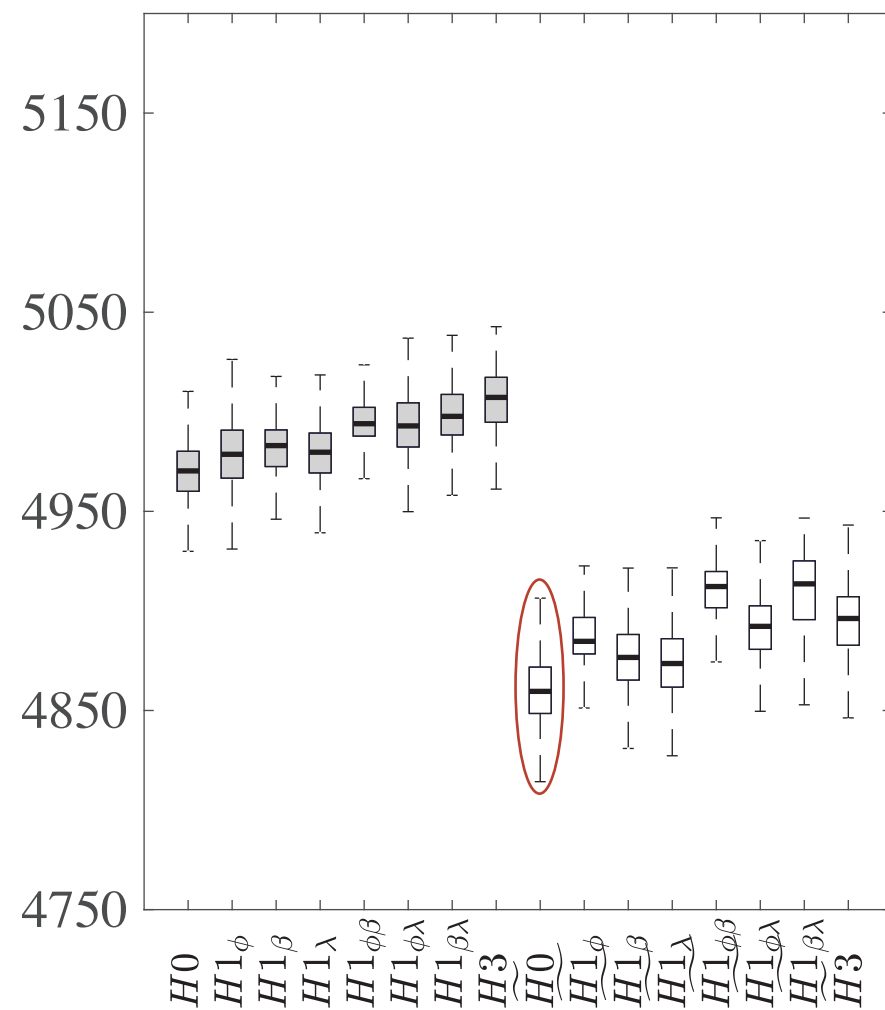

Hypotheses
