# Supplementary material for: Linking Light-Dependent Life History Traits with Population Dynamics for Prochlorococcus and Cyanophage
Source: PubMed Central journal article supplement (PMC7112961; doi:10.1128/msystems.00586-19), 2020-03-31
Supplement: msystems.00586-19-st001.pdf [file msystems.00586-19-st001.pdf]

| Parameters  | Model                                       | Measurements from [50]                      |
|-------------|---------------------------------------------|---------------------------------------------|
| $\alpha$    | $1.10 \cdot 10^{-3} \pm 3.10 \cdot 10^{-4}$ | $5.83 \cdot 10^{-4} \pm 4.17 \cdot 10^{-5}$ |
| $L_{opt}$   | $44.78 \pm 7.98$                            | $45 \pm 7$                                  |
| $\mu_{max}$ | $0.035 \pm 0.0021$                          | $0.0262 \pm 0.0025$                         |
| $K_L$       | $151.59 \pm 17.51$                          | –                                           |
| $\omega$    | $0.0032 \pm 0.0012$                         | –                                           |
