# Supplementary material for: Linking Light-Dependent Life History Traits with Population Dynamics for Prochlorococcus and Cyanophage
Source: PubMed Central journal article supplement (PMC7112961; doi:10.1128/msystems.00586-19), 2020-03-31
Supplement: msystems.00586-19-st002_revised.pdf [file msystems.00586-19-st002_revised.pdf]

| Parameters | Meaning                | unit                  |
|------------|------------------------|-----------------------|
| $\mu$      | Host growth rate       | $\text{h}^{-1}$       |
| K          | Host carrying capacity | $\text{cell ml}^{-1}$ |
| $\omega$   | Host mortality         | $\text{h}^{-1}$       |
| $\phi$     | Viral adsorption       | $\text{ml h}^{-1}$    |
| $\lambda$  | Latent period          | h                     |
| $\beta$    | Burst size             | no dimension          |
| $\delta$   | Viral decay            | $\text{h}^{-1}$       |
