# Supplementary material for: Linking Light-Dependent Life History Traits with Population Dynamics for Prochlorococcus and Cyanophage
Source: PubMed Central journal article supplement (PMC7112961; doi:10.1128/msystems.00586-19), 2020-03-31
Supplement: msystems.00586-19-st003.pdf [file msystems.00586-19-st003.pdf]

**P-HM2**

| Parameters    | From this study                                                                                    | From [51]                             |
|---------------|----------------------------------------------------------------------------------------------------|---------------------------------------|
| Adsorption    | $9.80 \cdot 10^{-12} \text{ ml h}^{-1}$ (Dark) and $2.55 \cdot 10^{-10} \text{ ml h}^{-1}$ (Light) | –                                     |
| Latent period | $\leq 6 \text{ h}$                                                                                 | 5 (5 – 6.5) h                         |
| Burst size    | –                                                                                                  | 28 (18 – 30) Virus cell <sup>-1</sup> |

**P-SSP7**

| Parameters    | From this study                                                                                    | From [51]                             |
|---------------|----------------------------------------------------------------------------------------------------|---------------------------------------|
| Adsorption    | $8.39 \cdot 10^{-11} \text{ ml h}^{-1}$ (Dark) and $7.98 \cdot 10^{-11} \text{ ml h}^{-1}$ (Light) | –                                     |
| Latent period | $\leq 6 \text{ h}$                                                                                 | 5 (5 – 9) h                           |
| Burst size    | –                                                                                                  | 40 (37 – 74) Virus cell <sup>-1</sup> |
