# Supplementary material for: Linking Light-Dependent Life History Traits with Population Dynamics for Prochlorococcus and Cyanophage
Source: PubMed Central journal article supplement (PMC7112961; doi:10.1128/msystems.00586-19), 2020-03-31
Supplement: msystems.00586-19-st004_revised.pdf [file msystems.00586-19-st004_revised.pdf]

**HM2/MED4**

|                     | $H0$                                                               | $H5_{\phi\lambda}$                                                 | $\tilde{H}1_{\phi}$                                                |
|---------------------|--------------------------------------------------------------------|--------------------------------------------------------------------|--------------------------------------------------------------------|
| Adsorption          | $9.3 \cdot 10^{-10}$ ( $8.7 \cdot 10^{-10} - 9.8 \cdot 10^{-10}$ ) | –                                                                  | –                                                                  |
| Adsorption light    | –                                                                  | $1.6 \cdot 10^{-9}$ ( $1.5 \cdot 10^{-9} - 1.7 \cdot 10^{-9}$ )    | $5.5 \cdot 10^{-10}$ ( $5.4 \cdot 10^{-10} - 5.7 \cdot 10^{-10}$ ) |
| Adsorption dark     | –                                                                  | $4.5 \cdot 10^{-12}$ ( $1.3 \cdot 10^{-12} - 1.2 \cdot 10^{-11}$ ) | $3.1 \cdot 10^{-16}$ ( $3.0 \cdot 10^{-18} - 4.7 \cdot 10^{-14}$ ) |
| Latent period       | 42.4 (41.2 – 43.6)                                                 | –                                                                  | 14.8 (14.4 – 15.6)                                                 |
| Latent period light | –                                                                  | 32 (31.2 – 33.2)                                                   | –                                                                  |
| Latent period dark  | –                                                                  | 56 (51.6 – 62)                                                     | –                                                                  |
| Burst size          | 113.0 (107.2 – 117.1)                                              | 116.4 (111.6 – 118.5)                                              | 56.1 (52.8 – 59.6)                                                 |

**SSP7/MED4**

|                  | $H0$                                                               | $H2_{\phi}$                                                         | $\tilde{H}0$                                                       |
|------------------|--------------------------------------------------------------------|---------------------------------------------------------------------|--------------------------------------------------------------------|
| Adsorption       | $8.8 \cdot 10^{-11}$ ( $8.2 \cdot 10^{-11} - 9.6 \cdot 10^{-11}$ ) | –                                                                   | $2.6 \cdot 10^{-11}$ ( $2.5 \cdot 10^{-11} - 2.7 \cdot 10^{-11}$ ) |
| Adsorption light | –                                                                  | $8.7 \cdot 10^{-11}$ ( $7.4 \cdot 10^{-11} - 10.0 \cdot 10^{-11}$ ) | –                                                                  |
| Adsorption dark  | –                                                                  | $9.4 \cdot 10^{-11}$ ( $7.8 \cdot 10^{-11} - 1.1 \cdot 10^{-10}$ )  | –                                                                  |
| Latent period    | 26.4 (25.6 – 26.8)                                                 | 26.4 (25.6 – 27.2)                                                  | 10 (9.6 – 10.4)                                                    |
| Burst size       | 119.1 (118.0 – 119.6)                                              | 119.1 (118.2 – 119.6)                                               | 119.1 (118.2 – 119.6)                                              |
